# Supplementary material
Source: ML conference proceedings conference paper supplement (https://proceedings.neurips.cc/paper_files/paper/2011/hash/3644a684f98ea8fe223c713b77189a77-Abstract.html)
Supplement: Supplementary file 2 [file 3644a684f98ea8fe223c713b77189a77-Supplemental.zip]

Archive with 1 entries (1 files):
- all/Paper 200/nips11_supplementary.pdf
